# Supplementary material for: Evaluation of the Physicochemical and Functional Properties of Aquasoya (Glycine max Merr.) Powder for Vegan Muffin Preparation
Source: Foods. 2022 Feb 18;11(4):591. doi: 10.3390/foods11040591 (PMC8870977; doi:10.3390/foods11040591)
Supplement: Supplementary file 1 [file foods-11-00591-s001.zip › foods-1457492-supplementary.pdf]

**Supplementary Material:**

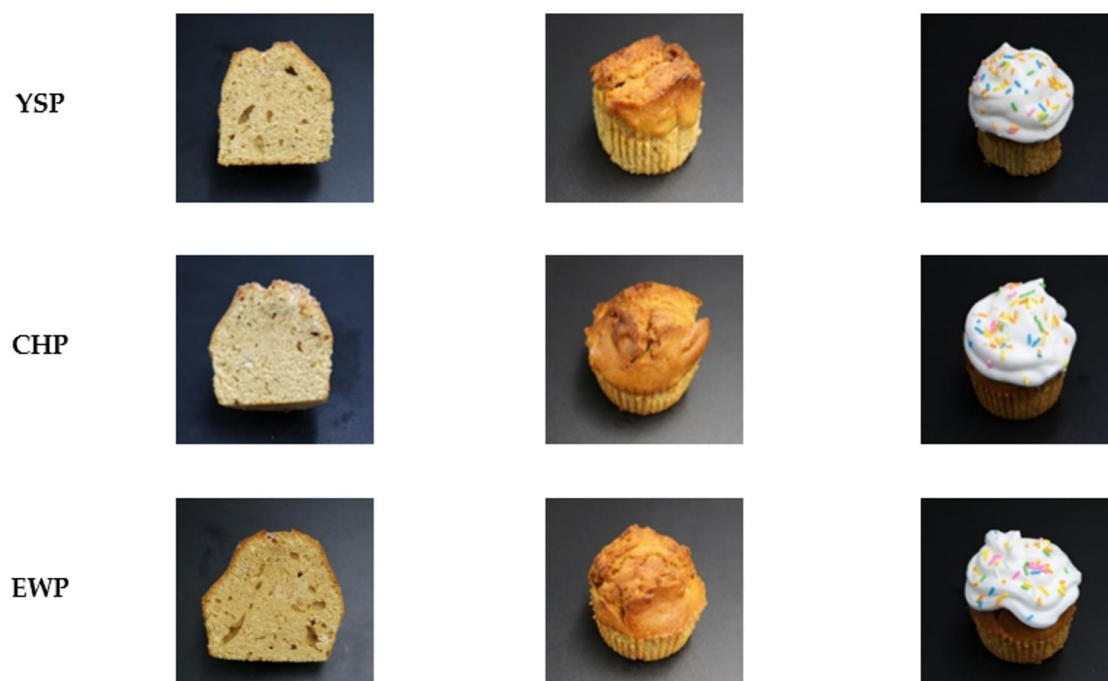

**Figure S1.** Pictures of muffins cut in half, whole muffins (without meringue), and whole muffins (with meringue) made from yellow soybean powder (YSP), chickpea powder (CHP), and egg white powder (EWP).
